# Supplementary material for: A systematic survey in Arabidopsis thaliana of transcription factors that modulate circadian parameters
Source: PubMed Central journal article supplement (PMC2410138; doi:10.1186/1471-2164-9-182), 2008-04-21
Supplement: 1471-2164-9-182-S1.pdf [file 1471-2164-9-182-S1.pdf]

**Supplemental table 1.**

| <b>GeneID</b>          | <b>At number</b> | <b>Mean Exp.Lev.</b> | <b>Period (h)</b> | <b>Phase (ZT h)</b> | <b>pMMC-Beta</b> |
|------------------------|------------------|----------------------|-------------------|---------------------|------------------|
| <i>bHLH65/PIL6</i>     | At3g59060        | 1574.70              | 23.40             | 30.33               | 0.004            |
| <i>bHLH9/PIF4</i>      | At2g43010        | 1577.20              | 23.40             | 32.62               | 0.005            |
| <i>bHLH16</i>          | At4g00050        | 2330.60              | 23.50             | 47.93               | 0.005            |
| <i>bZIP3</i>           | At5g15830        | 222.75               | 24.00             | 31.28               | 0.007            |
| <i>bZIP54/GBF2</i>     | At4g01120        | 498.45               | 20.60             | 45.93               | 0.007            |
| <i>bHLH4/AtMYC4</i>    | At4g17880        | 662.77               | 23.20             | 48.65               | 0.008            |
| <i>MYB106</i>          | At3g01140        | 737.64               | 24.00             | 43.04               | 0.008            |
| <i>MYB28</i>           | At5g61420        | 2214.50              | 24.40             | 42.56               | 0.008            |
| <i>bZIP64</i>          | At5g06839        | 447.28               | 22.70             | 26.21               | 0.009            |
| <i>bHLH15/PIL5</i>     | At2g20180        | 680.73               | 26.60             | 26.88               | 0.009            |
| <i>MYB91</i>           | At2g37630        | 3688.00              | 24.00             | 42.08               | 0.011            |
| <i>bHLH153</i>         | At1g05710        | 480.92               | 24.90             | 45.35               | 0.011            |
| <i>bHLH26/HFR1</i>     | At1g02340        | 768.14               | 24.20             | 30.64               | 0.012            |
| <i>bZIP22/TGA3</i>     | At1g22070        | 1421.10              | 22.20             | 41.58               | 0.012            |
| <i>bZIP1</i>           | At5g49450        | 615.40               | 24.20             | 33.81               | 0.012            |
| <i>bHLH73/ALCATRAZ</i> | At5g67110        | 426.42               | 23.20             | 47.53               | 0.012            |
| <i>bHLH147</i>         | At3g17100        | 1146.40              | 24.30             | 32.40               | 0.013            |
| <i>bHLH34</i>          | At3g23210        | 1199.70              | 27.10             | 41.13               | 0.014            |
| <i>bZIP37/ABF3</i>     | At4g34000        | 1230.60              | 23.10             | 27.78               | 0.016            |
| <i>bHLH64</i>          | At2g18300        | 1566.70              | 24.90             | 31.94               | 0.017            |
| <i>bHLH150</i>         | At3g05800        | 675.22               | 23.60             | 37.60               | 0.019            |
| <i>MYB32</i>           | At4g34990        | 538.59               | 25.30             | 41.20               | 0.019            |
| <i>bHLH136</i>         | At5g39860        | 625.80               | 24.80             | 29.33               | 0.020            |
| <i>bZIP58</i>          | At1g13600        | 180.43               | 26.20             | 27.72               | 0.021            |
| <i>bHLH142</i>         | At5g64340        | 928.39               | 26.30             | 36.38               | 0.021            |
| <i>bZIP63/BZO3H3</i>   | At5g28770        | 559.26               | 23.60             | 31.34               | 0.023            |
| <i>MYB44</i>           | At5g67300        | 1159.50              | 24.60             | 27.26               | 0.026            |
| <i>bHLH130</i>         | At2g42280        | 326.71               | 20.80             | 46.39               | 0.027            |
| <i>bHLH104</i>         | At4g14410        | 1218.90              | 21.50             | 47.69               | 0.028            |
| <i>MYB3</i>            | At1g22640        | 1818.40              | 25.70             | 27.93               | 0.031            |
| <i>bHLH148</i>         | At3g06590        | 963.85               | 22.30             | 42.96               | 0.032            |
| <i>MYB59</i>           | At5g59780        | 1779.60              | 24.70             | 31.85               | 0.032            |
| <i>bZIP47/TGA1</i>     | At5g65210        | 1435.30              | 27.30             | 27.24               | 0.032            |
| <i>bZIP61</i>          | At3g58120        | 405.24               | 24.10             | 33.50               | 0.033            |
| <i>MYB48</i>           | At3g46130        | 445.75               | 25.20             | 35.79               | 0.035            |
| <i>bHLH7</i>           | At1g03040        | 1019.70              | 25.10             | 39.24               | 0.037            |
| <i>bHLH128</i>         | At1g05805        | 638.07               | 23.70             | 35.83               | 0.038            |
| <i>bZIP11/ATB2</i>     | At4g34590        | 1815.70              | 20.70             | 49.11               | 0.039            |
| <i>bZIP41/GBF1</i>     | At4g36730        | 1414.00              | 22.10             | 34.75               | 0.039            |
| <i>bZIP56/HY5</i>      | At5g11260        | 524.63               | 22.30             | 49.17               | 0.040            |
| <i>MYB75/PAP1</i>      | At1g56650        | 771.68               | 26.10             | 43.47               | 0.045            |
| <i>bZIP9/CPRF-2</i>    | At5g24800        | 1463.20              | 22.40             | 36.24               | 0.047            |
