# Supplementary material for: A systematic survey in Arabidopsis thaliana of transcription factors that modulate circadian parameters
Source: PubMed Central journal article supplement (PMC2410138; doi:10.1186/1471-2164-9-182), 2008-04-21
Supplement: 1471-2164-9-182-S2.pdf [file 1471-2164-9-182-S2.pdf]

Supplement table 2.

## Estimated period length of transgenic lines over-expressing MYB transcription factors

| genes              | At number        | lines    | n  | Period | ± SE   | comments | control plants |        |        |  |
|--------------------|------------------|----------|----|--------|--------|----------|----------------|--------|--------|--|
|                    |                  |          |    |        |        |          | n              | Period | ± SE   |  |
| <b>MYB5</b>        | <b>At3g13540</b> | <b>A</b> | 29 | 24.35  | ± 0.37 |          | 29             | 24.39  | ± 0.28 |  |
|                    |                  | <b>B</b> | 11 | 24.19  | ± 0.13 |          | 12             | 23.87  | ± 0.16 |  |
| <b>MYB6</b>        | <b>At4g38620</b> | <b>A</b> | 22 | 24.19  | ± 0.37 |          | 22             | 24.73  | ± 0.21 |  |
|                    |                  | <b>B</b> | 12 | 24.77  | ± 0.25 |          | 10             | 24.72  | ± 0.22 |  |
| <b>MYB55</b>       | <b>At4g01680</b> | <b>C</b> | 32 | 24.38  | ± 0.21 |          | 25             | 24.41  | ± 0.20 |  |
|                    |                  | <b>D</b> | 26 | 24.60  | ± 0.25 |          | 18             | 24.04  | ± 0.21 |  |
|                    |                  | <b>K</b> | 13 | 24.56  | ± 0.14 |          | 12             | 24.19  | ± 0.31 |  |
| <b>MYB64</b>       | <b>At5g11050</b> | <b>A</b> | 16 | 24.04  | ± 0.36 |          | 18             | 24.33  | ± 0.25 |  |
|                    |                  | <b>B</b> | 28 | 24.67  | ± 0.39 |          | 31             | 24.11  | ± 0.35 |  |
|                    |                  | <b>C</b> | 11 | 24.64  | ± 0.66 |          | 21             | 24.61  | ± 0.37 |  |
|                    |                  | <b>D</b> | 11 | 23.70  | ± 0.23 |          | 9              | 24.02  | ± 0.22 |  |
| <b>MYB95</b>       | <b>At1g74430</b> | <b>A</b> | 12 | 23.78  | ± 0.33 |          | 9              | 24.02  | ± 0.22 |  |
|                    |                  | <b>B</b> | 24 | 24.50  | ± 0.57 |          | 20             | 24.26  | ± 0.17 |  |
|                    |                  | <b>F</b> | 8  | 24.42  | ± 0.28 |          | 11             | 25.55  | ± 0.57 |  |
|                    |                  | <b>G</b> | 12 | 24.46  | ± 0.16 |          | 10             | 25.07  | ± 0.56 |  |
| <b>MYB98</b>       | <b>At4g18770</b> | <b>E</b> | 31 | 24.24  | ± 0.34 |          | 28             | 24.56  | ± 0.31 |  |
|                    |                  | <b>G</b> | 34 | 25.17  | ± 0.49 |          | 33             | 24.07  | ± 0.25 |  |
| <b>MYB103</b>      | <b>At1g63910</b> | <b>B</b> | 37 | 24.23  | ± 0.37 |          | 37             | 23.91  | ± 0.36 |  |
|                    |                  | <b>C</b> | 16 | 24.57  | ± 0.19 |          | 21             | 24.30  | ± 0.28 |  |
|                    |                  | <b>E</b> | 24 | 24.49  | ± 0.34 |          | 21             | 24.30  | ± 0.28 |  |
|                    |                  | <b>F</b> | 15 | 24.50  | ± 0.28 |          | 17             | 24.80  | ± 0.28 |  |
| <b>MYB107</b>      | <b>At3g02940</b> | <b>I</b> | 16 | 24.67  | ± 0.63 |          | 17             | 24.80  | ± 0.28 |  |
| <b>MYB111</b>      | <b>At5g49330</b> | <b>A</b> | 44 | 24.64  | ± 0.30 |          | 37             | 24.35  | ± 0.29 |  |
|                    |                  | <b>D</b> | 33 | 24.87  | ± 0.31 |          | 38             | 24.27  | ± 0.32 |  |
|                    |                  | <b>E</b> | 14 | 24.68  | ± 0.60 |          | 11             | 23.24  | ± 0.50 |  |
| <b>MYB114</b>      | <b>At1g66380</b> | <b>A</b> | 25 | 24.44  | ± 0.61 |          | 42             | 24.30  | ± 0.30 |  |
|                    |                  | <b>B</b> | 15 | 24.69  | ± 0.33 |          | 16             | 24.70  | ± 0.60 |  |
| <b>MYB116/CPM7</b> | <b>At1g25340</b> | <b>E</b> | 23 | 24.52  | ± 0.30 |          | 20             | 24.55  | ± 0.41 |  |
|                    |                  | <b>F</b> | 19 | 24.65  | ± 0.19 |          | 14             | 24.26  | ± 0.35 |  |
| <b>MYB124</b>      | <b>At1g14350</b> | <b>1</b> | 11 | 24.96  | ± 0.34 |          | 4              | 25.05  | ± 0.36 |  |
|                    |                  | <b>2</b> | 14 | 24.64  | ± 0.24 |          | 11             | 24.24  | ± 0.11 |  |
| <b>MYB84</b>       | <b>At3g49690</b> | <b>1</b> | 23 | 24.55  | ± 0.23 |          | 15             | 24.64  | ± 0.24 |  |
|                    |                  | <b>3</b> | 16 | 23.77  | ± 0.32 |          | 13             | 23.94  | ± 0.23 |  |
|                    |                  |          |    |        |        |          |                |        |        |  |
| <b>MYB91</b>       | <b>At2g37630</b> | <b>1</b> | 11 | 24.44  | ± 0.33 |          | 11             | 24.13  | ± 0.30 |  |
|                    |                  | <b>2</b> | 3  | 24.20  | ± 0.29 |          | 6              | 24.43  | ± 0.40 |  |
|                    |                  | <b>5</b> | 15 | 25.10  | ± 0.77 |          | 6              | 24.25  | ± 0.32 |  |
|                    |                  | <b>7</b> | 12 | 26.32  | ± 1.13 | long*    | 9              | 24.03  | ± 0.29 |  |
| <b>MYB79</b>       | <b>At4g13480</b> | <b>1</b> | 42 | 24.70  | ± 0.26 |          | 38             | 24.29  | ± 0.30 |  |
|                    |                  | <b>2</b> | 39 | 25.04  | ± 0.49 |          | 30             | 24.16  | ± 0.27 |  |
|                    |                  | <b>3</b> | 23 | 25.21  | ± 0.34 | long*    | 19             | 23.83  | ± 0.19 |  |
|                    |                  | <b>4</b> | 23 | 24.44  | ± 0.22 |          | 20             | 24.07  | ± 0.20 |  |
| <b>MYB115</b>      | <b>At5g40360</b> | <b>3</b> | 36 | 24.69  | ± 0.39 |          | 42             | 24.34  | ± 0.17 |  |
|                    |                  | <b>5</b> | 34 | 25.34  | ± 0.37 |          | 44             | 24.77  | ± 0.25 |  |
|                    |                  | <b>7</b> | 19 | 25.00  | ± 0.19 |          | 23             | 24.74  | ± 0.35 |  |
|                    |                  | <b>8</b> | 25 | 25.86  | ± 0.39 | long*    | 13             | 24.84  | ± 0.20 |  |
| <b>MYB29</b>       | <b>At5g07690</b> | <b>2</b> | 52 | 24.60  | ± 0.25 |          | 36             | 24.61  | ± 0.24 |  |
|                    |                  | <b>3</b> | 39 | 24.12  | ± 0.34 |          | 31             | 24.52  | ± 0.26 |  |
| <b>MYB101</b>      | <b>At2g32460</b> | <b>6</b> | 39 | 24.56  | ± 0.23 |          | 28             | 24.52  | ± 0.25 |  |
|                    |                  | <b>7</b> | 31 | 25.70  | ± 0.29 | long*    | 23             | 24.61  | ± 0.32 |  |
| <b>MYB109</b>      | <b>At3g55730</b> | <b>1</b> | 33 | 24.65  | ± 0.40 |          | 25             | 24.48  | ± 0.34 |  |
|                    |                  | <b>3</b> | 23 | 24.45  | ± 0.24 |          | 29             | 24.31  | ± 0.21 |  |
|                    |                  | <b>4</b> | 27 | 24.77  | ± 0.32 |          | 16             | 24.12  | ± 0.25 |  |
|                    |                  | <b>5</b> | 9  | 24.11  | ± 0.13 |          | 10             | 24.32  | ± 0.23 |  |
| <b>MYB51</b>       | <b>At1g18570</b> | <b>1</b> | 19 | 24.07  | ± 0.24 |          | 17             | 24.20  | ± 0.28 |  |
|                    |                  | <b>4</b> | 22 | 24.45  | ± 0.35 |          | 15             | 24.66  | ± 0.25 |  |
|                    |                  | <b>7</b> | 13 | 24.44  | ± 0.25 |          | 11             | 24.80  | ± 0.32 |  |
| <b>MYB43</b>       | <b>At5g16660</b> | <b>1</b> | 38 | 24.62  | ± 0.38 |          | 25             | 24.72  | ± 0.25 |  |
|                    |                  | <b>2</b> | 29 | 25.04  | ± 0.40 |          | 24             | 24.69  | ± 0.46 |  |

continued in next page

|                   |                  |           |    |       |        |             |    |       |        |
|-------------------|------------------|-----------|----|-------|--------|-------------|----|-------|--------|
| <b>MYB122</b>     | <b>At1g74080</b> | <b>1</b>  | 12 | 24.60 | ± 0.32 |             | 17 | 24.72 | ± 0.53 |
|                   |                  | <b>3</b>  | 42 | 24.44 | ± 0.29 |             | 28 | 24.27 | ± 0.15 |
| <b>MYB85</b>      | <b>At4g22680</b> | <b>1</b>  | 36 | 24.46 | ± 0.22 | long*       | 27 | 24.01 | ± 0.15 |
|                   |                  | <b>2</b>  | 35 | 24.54 | ± 0.37 |             | 33 | 24.04 | ± 0.30 |
|                   |                  | <b>3</b>  | 11 | 24.17 | ± 0.39 |             | 9  | 24.99 | ± 0.25 |
|                   |                  | <b>4</b>  | 21 | 25.40 | ± 0.59 | long*       | 13 | 24.67 | ± 0.49 |
| <b>MYB99</b>      | <b>At5g62320</b> | <b>2</b>  | 15 | 24.77 | ± 0.16 |             | 13 | 24.67 | ± 0.49 |
|                   |                  | <b>5</b>  | 19 | 25.21 | ± 0.12 |             | 16 | 24.87 | ± 0.24 |
| <b>MYB3R2</b>     | <b>At4g00540</b> | <b>1</b>  | 43 | 24.44 | ± 0.46 | phase       | 31 | 24.96 | ± 0.27 |
|                   |                  | <b>2</b>  | 28 | 24.53 | ± 0.29 | phase       | 26 | 24.60 | ± 0.30 |
|                   |                  | <b>5</b>  | 12 | 24.00 | ± 0.19 | phase       | 9  | 23.73 | ± 0.21 |
|                   |                  | <b>6</b>  | 11 | 26.69 | ± 0.28 | phase/long* | 6  | 25.57 | ± 0.28 |
|                   |                  | <b>7</b>  | 12 | 25.06 | ± 0.33 | phase       | 12 | 24.39 | ± 0.29 |
| <b>MYB113</b>     | <b>At1g66370</b> | <b>2</b>  | 17 | 24.71 | ± 0.31 |             | 18 | 24.98 | ± 0.28 |
|                   |                  | <b>3</b>  | 28 | 24.60 | ± 0.31 |             | 15 | 24.91 | ± 0.22 |
| <b>MYB9</b>       | <b>At5g16770</b> | <b>1</b>  | 41 | 24.50 | ± 0.15 |             | 25 | 24.70 | ± 0.23 |
|                   |                  | <b>2</b>  | 38 | 24.69 | ± 0.13 |             | 29 | 24.42 | ± 0.22 |
|                   |                  | <b>3</b>  | 25 | 24.39 | ± 0.19 |             | 19 | 24.28 | ± 0.18 |
|                   |                  | <b>4</b>  | 20 | 24.87 | ± 0.26 |             | 17 | 24.15 | ± 0.12 |
| <b>MYB30/HSR1</b> | <b>At3g28910</b> | <b>2</b>  | 32 | 25.41 | ± 0.41 |             | 29 | 24.30 | ± 0.17 |
|                   |                  | <b>3</b>  | 20 | 24.39 | ± 0.21 |             | 18 | 24.31 | ± 0.17 |
|                   |                  | <b>4</b>  | 5  | 25.05 | ± 0.22 | long*       | 8  | 24.63 | ± 0.14 |
|                   |                  | <b>5</b>  | 6  | 24.98 | ± 0.13 | long*       | 9  | 24.17 | ± 0.20 |
| <b>MYB59</b>      | <b>At5g59780</b> | <b>2</b>  | 30 | 24.76 | ± 0.34 | long*       | 26 | 24.06 | ± 0.22 |
|                   |                  | <b>13</b> | 17 | 24.57 | ± 0.28 |             | 25 | 24.33 | ± 0.20 |
|                   |                  | <b>17</b> | 5  | 24.30 | ± 0.18 |             | 8  | 23.57 | ± 0.20 |
| <b>MYB62</b>      | <b>At1g68320</b> | <b>7</b>  | 15 | 24.30 | ± 0.55 |             | 13 | 24.30 | ± 0.14 |
|                   |                  | <b>8</b>  | 23 | 24.19 | ± 0.37 |             | 16 | 24.64 | ± 0.14 |
|                   |                  | <b>16</b> | 12 | 24.75 | ± 0.24 |             | 9  | 23.86 | ± 0.15 |
| <b>MYB102/M4</b>  | <b>At4g21440</b> | <b>1</b>  | 42 | 24.09 | ± 0.24 |             | 33 | 24.23 | ± 0.18 |
|                   |                  | <b>2</b>  | 21 | 24.57 | ± 0.23 |             | 18 | 25.34 | ± 0.24 |
|                   |                  | <b>4</b>  | 13 | 25.27 | ± 0.19 |             | 7  | 24.60 | ± 0.44 |
| <b>MYB78</b>      | <b>At5g49620</b> | <b>9</b>  | 28 | 24.98 | ± 0.30 |             | 20 | 25.00 | ± 0.35 |
|                   |                  | <b>10</b> | 21 | 24.58 | ± 0.29 |             | 20 | 24.70 | ± 0.32 |
| <b>MYB94</b>      | <b>At3g47600</b> | <b>1</b>  | 17 | 24.81 | ± 0.14 |             | 12 | 24.37 | ± 0.22 |
|                   |                  | <b>2</b>  | 20 | 24.98 | ± 0.32 |             | 18 | 24.58 | ± 0.30 |
| <b>MYB3R3a</b>    | <b>At3g09370</b> | <b>A</b>  | 28 | 24.86 | ± 0.26 |             | 28 | 24.08 | ± 0.32 |
|                   |                  | <b>B</b>  | 32 | 25.83 | ± 0.31 | long*       | 32 | 23.81 | ± 0.23 |
|                   |                  | <b>D</b>  | 15 | 24.53 | ± 0.29 |             | 18 | 22.98 | ± 0.31 |
|                   |                  | <b>F</b>  | 32 | 24.58 | ± 0.62 |             | 29 | 24.59 | ± 0.19 |
| <b>MYB3R3b</b>    | <b>At3g09370</b> | <b>K</b>  | 37 | 24.75 | ± 0.21 |             | 31 | 24.55 | ± 0.22 |
|                   |                  | <b>L</b>  | 34 | 24.79 | ± 0.23 |             | 35 | 24.92 | ± 0.20 |
| <b>MYB3R4</b>     | <b>At5g11510</b> | <b>C</b>  | 36 | 25.51 | ± 0.35 |             | 32 | 24.94 | ± 0.31 |
|                   |                  | <b>K</b>  | 26 | 25.07 | ± 0.20 |             | 30 | 24.87 | ± 0.43 |
| <b>MYB4R1</b>     | <b>At3g18100</b> | <b>F</b>  | 12 | 24.70 | ± 0.15 |             | 9  | 24.37 | ± 0.23 |
| <b>MYB26</b>      | <b>At3g13890</b> | <b>I</b>  | 35 | 25.06 | ± 0.24 |             | 30 | 24.94 | ± 0.31 |
|                   |                  | <b>L</b>  | 6  | 25.07 | ± 0.28 |             | 21 | 24.18 | ± 0.20 |
|                   |                  | <b>H</b>  | 5  | 24.23 | ± 0.19 |             | 12 | 25.20 | ± 0.17 |
| <b>MYB3R5</b>     | <b>At5g02320</b> | <b>1</b>  | 15 | 25.40 | ± 0.30 |             | 5  | 23.81 | ± 0.55 |
|                   |                  | <b>3</b>  | 13 | 24.63 | ± 0.03 |             | 7  | 24.14 | ± 0.32 |
