# Supplementary material for: A systematic survey in Arabidopsis thaliana of transcription factors that modulate circadian parameters
Source: PubMed Central journal article supplement (PMC2410138; doi:10.1186/1471-2164-9-182), 2008-04-21
Supplement: 1471-2164-9-182-S3.pdf [file 1471-2164-9-182-S3.pdf]

Supplement table 3.

## Estimated period length of transgenic lines over-expressing bHLH transcription factors

| genes                    | At number | line | n  | Period | ± SE   | comments    | control plants |        |        |
|--------------------------|-----------|------|----|--------|--------|-------------|----------------|--------|--------|
|                          |           |      |    |        |        |             | n              | Period | ± SE   |
| <i>bHLH1/GL3</i>         | At5g41315 | 2    | 23 | 24.91  | ± 0.20 |             | 18             | 24.72  | ± 0.15 |
|                          |           | 3    | 21 | 24.79  | ± 0.26 |             | 22             | 24.71  | ± 0.10 |
| <i>bHLH3</i>             | At4g16430 | 5    | 56 | 24.83  | ± 0.23 |             | 51             | 24.65  | ± 0.23 |
|                          |           | 7    | 31 | 25.02  | ± 0.21 |             | 31             | 24.36  | ± 0.31 |
|                          |           | 10   | 31 | 24.48  | ± 0.25 |             | 29             | 25.03  | ± 0.19 |
| <i>bHLH7</i>             | At1g03040 | 1    | 21 | 25.30  | ± 0.31 |             | 18             | 25.21  | ± 0.08 |
|                          |           | 5    | 14 | 25.02  | ± 0.17 |             | 15             | 25.63  | ± 0.16 |
| <i>bHLH12/AtMYC1</i>     | At4g00480 | 1    | 18 | 25.17  | ± 0.27 |             | 18             | 25.38  | ± 0.23 |
|                          |           | 2    | 23 | 25.02  | ± 0.20 |             | 18             | 25.42  | ± 0.37 |
| <i>bHLH16</i>            | At4g00050 | 1    | 32 | 25.04  | ± 0.25 |             | 29             | 25.39  | ± 0.36 |
|                          |           | 4    | 28 | 24.91  | ± 0.20 |             | 29             | 24.45  | ± 0.41 |
|                          |           | 5    | 12 | 24.82  | ± 0.41 |             | 14             | 24.95  | ± 0.40 |
|                          |           | 6    | 8  | 25.00  | ± 0.43 |             | 10             | 24.84  | ± 0.12 |
| <i>bHLH19</i>            | At2g22760 | 1    | 7  | 24.82  | ± 0.22 |             | 10             | 24.84  | ± 0.12 |
|                          |           | 3    | 14 | 24.47  | ± 0.64 |             | 11             | 25.07  | ± 0.17 |
| <i>bHLH29</i>            | At2g28160 | 1.1  | 36 | 24.69  | ± 0.20 |             | 30             | 24.54  | ± 0.15 |
|                          |           | 1.2  | 31 | 24.80  | ± 0.16 |             | 27             | 24.81  | ± 0.28 |
| <i>bHLH101</i>           | At5g04150 | 3    | 12 | 24.64  | ± 0.23 |             | 11             | 24.44  | ± 0.33 |
| <i>bHLH7</i>             | At1g03040 | E    | 21 | 24.51  | ± 0.54 |             | 16             | 24.31  | ± 0.35 |
|                          |           | H    | 28 | 24.25  | ± 0.33 |             | 29             | 24.33  | ± 0.42 |
|                          |           | J    | 13 | 26.31  | ± 0.99 |             | 11             | 24.63  | ± 0.11 |
| <i>bHLH5/ATR2/AtMYC1</i> | At5g46760 | B    | 36 | 24.65  | ± 0.29 |             | 28             | 24.40  | ± 0.27 |
|                          |           | C    | 23 | 24.37  | ± 0.25 |             | 30             | 24.18  | ± 0.39 |
|                          |           | E    | 12 | 30.02  | ± 3.88 |             | 11             | 24.77  | ± 0.26 |
| <i>bHLH14</i>            | At4g00870 | C    | 28 | 24.74  | ± 0.25 |             | 30             | 24.57  | ± 0.26 |
|                          |           | D    | 44 | 25.22  | ± 0.29 | long*       | 41             | 24.73  | ± 0.27 |
|                          |           | J    | 35 | 25.56  | ± 0.35 | long*       | 35             | 23.86  | ± 0.27 |
|                          |           | K    | 32 | 24.98  | ± 0.43 |             | 31             | 24.67  | ± 0.26 |
| <i>bHLH18</i>            | At2g22750 | A    | 23 | 24.82  | ± 0.31 |             | 25             | 24.14  | ± 0.32 |
|                          |           | B    | 28 | 24.98  | ± 0.30 |             | 25             | 23.89  | ± 0.27 |
|                          |           | C    | 13 | 24.62  | ± 0.16 |             | 15             | 24.18  | ± 0.37 |
| <i>bHLH28</i>            | At5g46830 | A    | 12 | 24.54  | ± 0.28 |             | 12             | 23.97  | ± 0.10 |
|                          |           | B    | 18 | 23.97  | ± 0.19 |             | 18             | 23.78  | ± 0.22 |
| <i>bHLH38/ORG2</i>       | At3g56970 | B    | 15 | 23.88  | ± 0.44 |             | 18             | 25.79  | ± 0.26 |
|                          |           | C    | 18 | 25.56  | ± 0.21 |             | 22             | 25.41  | ± 0.23 |
| <i>bHLH39/ORG3</i>       | At3g56980 | E    | 35 | 25.26  | ± 0.34 | long*       | 49             | 24.49  | ± 0.29 |
|                          |           | G    | 24 | 24.37  | ± 0.29 |             | 28             | 24.58  | ± 0.30 |
|                          |           | I    | 27 | 24.73  | ± 0.69 |             | 33             | 24.20  | ± 0.20 |
|                          |           | J    | 5  | 24.53  | ± 0.30 |             | 12             | 24.27  | ± 0.24 |
|                          |           | K    | 9  | 24.64  | ± 0.14 |             | 9              | 24.46  | ± 0.29 |
| <i>bHLH42/TT8</i>        | At4g09820 | C    | 11 | 24.54  | ± 0.53 |             | 21             | 24.36  | ± 0.26 |
|                          |           | E    | 10 | 24.58  | ± 0.16 |             | 9              | 24.37  | ± 0.09 |
|                          |           | J    | 7  | 24.06  | ± 0.17 |             | 4              | 25.87  | ± 0.50 |
|                          |           | L    | 15 | 27.57  | ± 0.86 |             | 18             | 24.90  | ± 0.42 |
| <i>bHLH50/BBE3</i>       | At1g73830 | A    | 14 | 25.19  | ± 0.44 |             | 18             | 24.90  | ± 0.42 |
|                          |           | E    | 39 | 25.11  | ± 0.62 |             | 30             | 24.68  | ± 0.20 |
| <i>bHLH68</i>            | At4g29100 | A    | 17 | 24.91  | ± 0.18 | long*       | 27             | 24.64  | ± 0.31 |
|                          |           | B    | 32 | 25.14  | ± 0.24 |             | 31             | 24.85  | ± 0.20 |
| <i>bHLH69</i>            | At4g30980 | A    | 47 | 25.20  | ± 0.44 | phase       | 42             | 24.98  | ± 0.18 |
|                          |           | B    | 51 | 25.39  | ± 0.33 | phase/long* | 51             | 24.61  | ± 0.21 |
|                          |           | D    | 17 | 24.92  | ± 0.21 | phase       | 18             | 24.28  | ± 0.15 |
|                          |           | E    | 8  | 24.70  | ± 0.37 | phase       | 4              | 25.87  | ± 0.50 |
|                          |           | I    | 22 | 24.19  | ± 0.25 | phase       | 21             | 24.95  | ± 0.32 |
| <i>bHLH72</i>            | At5g61270 | A    | 27 | 24.93  | ± 0.34 |             | 33             | 24.76  | ± 0.33 |
|                          |           | B    | 24 | 25.92  | ± 0.40 | long*       | 22             | 25.00  | ± 0.30 |
|                          |           | C    | 5  | 24.42  | ± 0.35 |             | 10             | 24.83  | ± 0.42 |
|                          |           | D    | 10 | 24.37  | ± 0.22 |             | 9              | 24.63  | ± 0.17 |

continued in next page

|                          |                  |          |    |       |        |       |    |       |        |
|--------------------------|------------------|----------|----|-------|--------|-------|----|-------|--------|
| <b>bHLH81</b>            | <b>At4g09180</b> | <b>B</b> | 24 | 25.33 | ± 0.90 |       | 19 | 24.44 | ± 0.35 |
|                          |                  | <b>C</b> | 17 | 24.52 | ± 0.41 |       | 17 | 24.52 | ± 0.23 |
| <b>bHLH87</b>            | <b>At3g21330</b> | <b>B</b> | 20 | 24.33 | ± 0.32 |       | 17 | 24.52 | ± 0.23 |
|                          |                  | <b>C</b> | 17 | 24.87 | ± 0.21 |       | 18 | 24.56 | ± 0.52 |
| <b>bHLH88</b>            | <b>At5g67060</b> | <b>D</b> | 22 | 24.65 | ± 0.28 |       | 18 | 24.19 | ± 0.31 |
|                          |                  | <b>E</b> | 11 | 24.83 | ± 0.27 |       | 20 | 24.98 | ± 0.39 |
|                          |                  | <b>N</b> | 8  | 24.82 | ± 0.15 |       | 6  | 25.37 | ± 1.12 |
| <b>bHLH91</b>            | <b>At2g31210</b> | <b>F</b> | 5  | 25.25 | ± 0.19 |       | 10 | 24.83 | ± 0.42 |
|                          |                  | <b>L</b> | 13 | 24.57 | ± 0.08 |       | 9  | 24.86 | ± 0.20 |
| <b>bHLH92</b>            | <b>At5g43650</b> | <b>A</b> | 39 | 25.17 | ± 0.33 | long  | 11 | 23.96 | ± 0.26 |
|                          |                  | <b>B</b> | 20 | 24.85 | ± 0.28 | long  | 9  | 24.31 | ± 0.23 |
|                          |                  | <b>D</b> | 31 | 24.90 | ± 0.34 | long  | 11 | 24.40 | ± 0.24 |
|                          |                  | <b>E</b> | 36 | 24.69 | ± 0.37 | long  | 11 | 23.91 | ± 0.20 |
| <b>bHLH100</b>           | <b>At2g41240</b> | <b>D</b> | 9  | 25.23 | ± 0.74 |       | 6  | 24.20 | ± 0.26 |
|                          |                  | <b>E</b> | 20 | 24.12 | ± 0.24 |       | 10 | 24.17 | ± 0.24 |
| <b>bHLH105</b>           | <b>At5g54680</b> | <b>E</b> | 20 | 24.05 | ± 0.26 |       | 19 | 24.03 | ± 0.18 |
|                          |                  | <b>I</b> | 17 | 24.59 | ± 0.53 |       | 16 | 24.19 | ± 0.21 |
| <b>bHLH125</b>           | <b>At1g62975</b> | <b>B</b> | 30 | 24.55 | ± 0.35 |       | 23 | 24.01 | ± 0.32 |
|                          |                  | <b>C</b> | 41 | 24.78 | ± 0.29 |       | 39 | 24.02 | ± 0.27 |
|                          |                  | <b>D</b> | 21 | 25.02 | ± 0.45 |       | 27 | 24.51 | ± 0.49 |
|                          |                  | <b>H</b> | 6  | 24.43 | ± 0.27 |       | 10 | 24.06 | ± 0.37 |
| <b>bHLH6/RAP1/AtMYC2</b> | <b>At1g32640</b> | <b>A</b> | 13 | 24.87 | ± 0.41 |       | 10 | 23.96 | ± 0.30 |
|                          |                  | <b>B</b> | 27 | 24.52 | ± 0.26 |       | 32 | 24.58 | ± 0.21 |
|                          |                  | <b>C</b> | 29 | 24.91 | ± 0.20 | long* | 32 | 23.91 | ± 0.20 |
|                          |                  | <b>D</b> | 9  | 24.90 | ± 0.28 | long* | 10 | 24.46 | ± 0.34 |
