# Supplementary material for: A systematic survey in Arabidopsis thaliana of transcription factors that modulate circadian parameters
Source: PubMed Central journal article supplement (PMC2410138; doi:10.1186/1471-2164-9-182), 2008-04-21
Supplement: 1471-2164-9-182-S4.pdf [file 1471-2164-9-182-S4.pdf]

Supplement table 4.

| Estimated period length of transgenic lines over-expressing bZIP transcription factors |           |          |    |        |        |          |                |        |   |      |
|----------------------------------------------------------------------------------------|-----------|----------|----|--------|--------|----------|----------------|--------|---|------|
| genes                                                                                  | At number | line     | n  | Period | ± SE   | comments | control plants |        |   |      |
|                                                                                        |           |          |    |        |        |          | n              | Period | ± | SE   |
| <i>bZIP48</i>                                                                          | At2g04038 | <i>C</i> | 6  | 23.62  | ± 0.49 | high RAE | 17             | 25.01  | ± | 0.66 |
|                                                                                        |           | <i>G</i> | 6  | 25.00  | ± 0.78 |          | 22             | 24.49  | ± | 0.31 |
|                                                                                        |           | <i>J</i> | 8  | 24.74  | ± 1.19 |          | 7              | 24.54  | ± | 0.58 |
| <i>bZIP50</i>                                                                          | At1g77920 | <i>B</i> | 11 | 24.79  | ± 0.37 |          | 12             | 23.87  | ± | 0.16 |
|                                                                                        |           | <i>D</i> | 39 | 24.04  | ± 0.19 |          | 30             | 23.95  | ± | 0.30 |
|                                                                                        |           | <i>E</i> | 6  | 24.63  | ± 0.24 |          | 11             | 24.66  | ± | 0.20 |
| <i>bZIP51/VIP1</i>                                                                     | At1g43700 | <i>E</i> | 17 | 24.63  | ± 0.31 |          | 10             | 23.89  | ± | 0.15 |
| <i>bZIP58</i>                                                                          | At1g13600 | <i>C</i> | 13 | 24.61  | ± 0.37 |          | 10             | 23.96  | ± | 0.30 |
