# Supplementary material for: A systematic survey in Arabidopsis thaliana of transcription factors that modulate circadian parameters
Source: PubMed Central journal article supplement (PMC2410138; doi:10.1186/1471-2164-9-182), 2008-04-21
Supplement: 1471-2164-9-182-S5.pdf [file 1471-2164-9-182-S5.pdf]

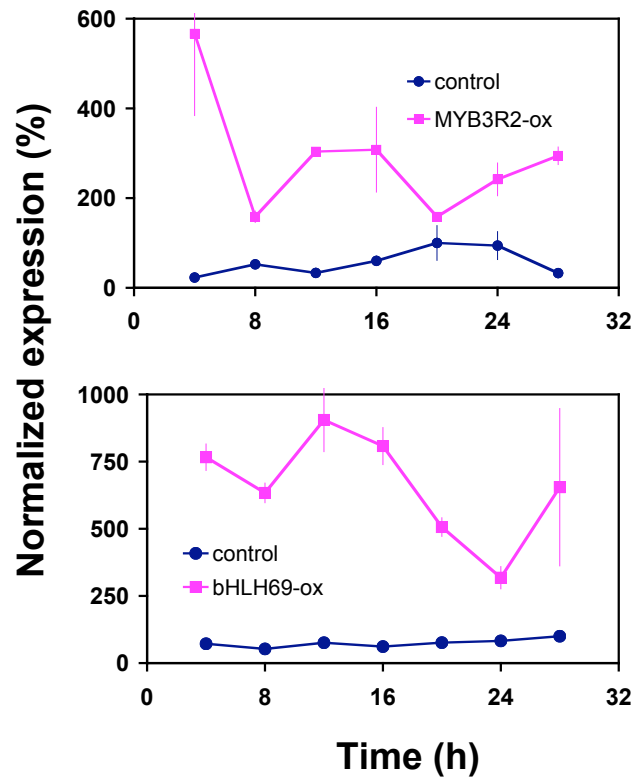

Figure S1
